# Supplementary material for: NME3 binds to phosphatidic acid and mediates PLD6-induced mitochondrial tethering
Source: PubMed Central journal article supplement (PMC10432850; doi:10.1083/jcb.202301091), 2023-08-16

Fig. 1D

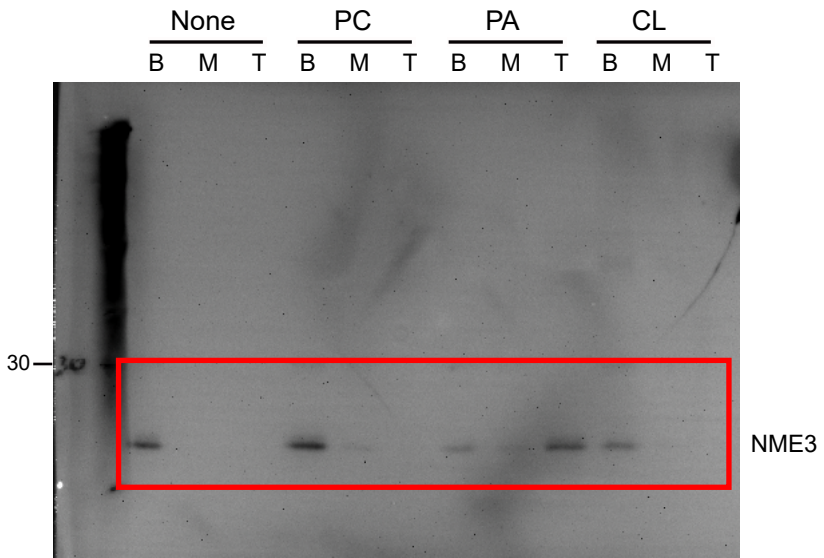

Supplement: JCB_202301091_SourceDataF1.pdf [file JCB_202301091_SourceDataF1.pdf]
