# Supplementary material for: NME3 binds to phosphatidic acid and mediates PLD6-induced mitochondrial tethering
Source: PubMed Central journal article supplement (PMC10432850; doi:10.1083/jcb.202301091), 2023-08-16

Fig. S4B

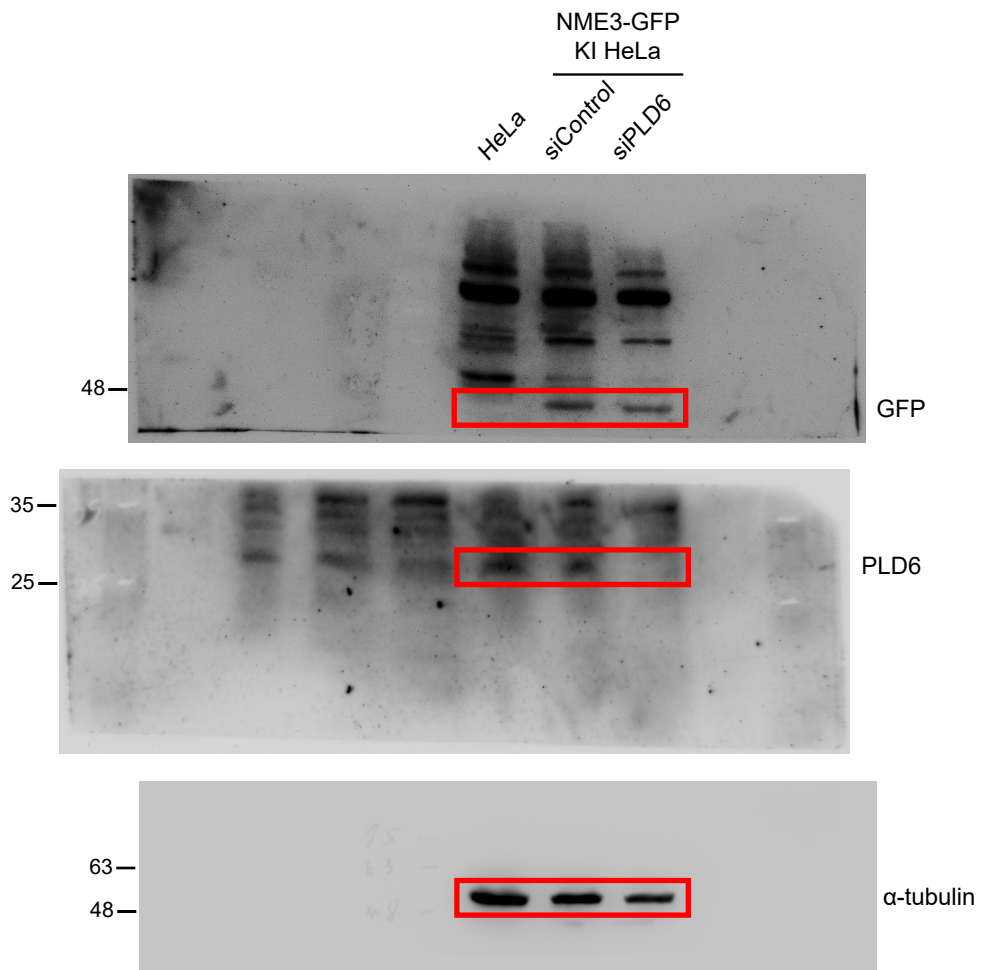

Fig. S4E

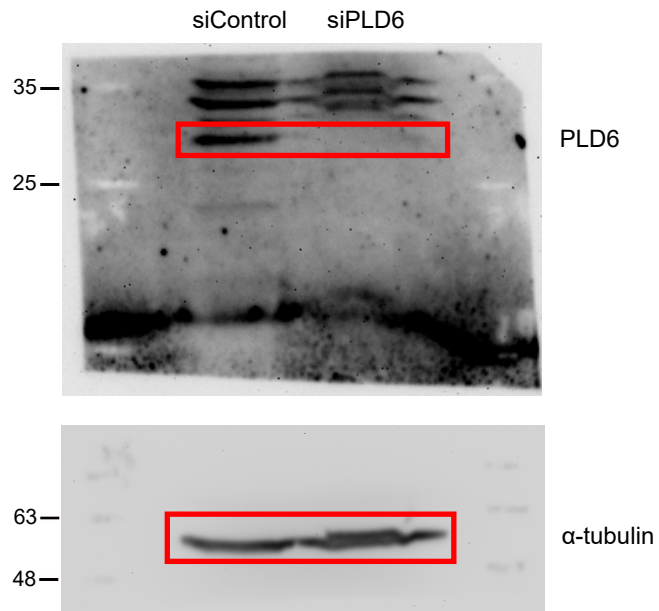

Fig. S4G

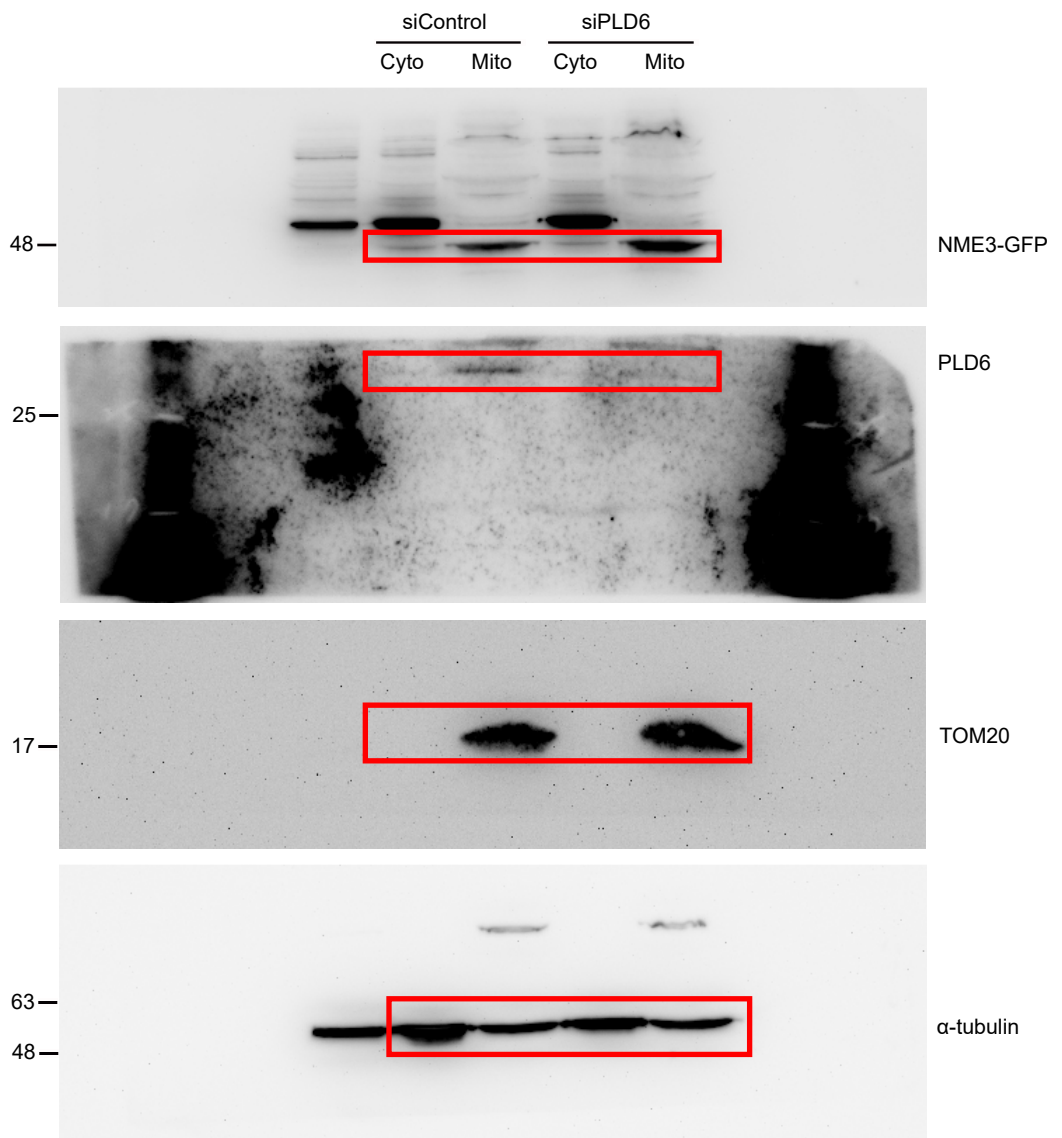

Fig. S4H

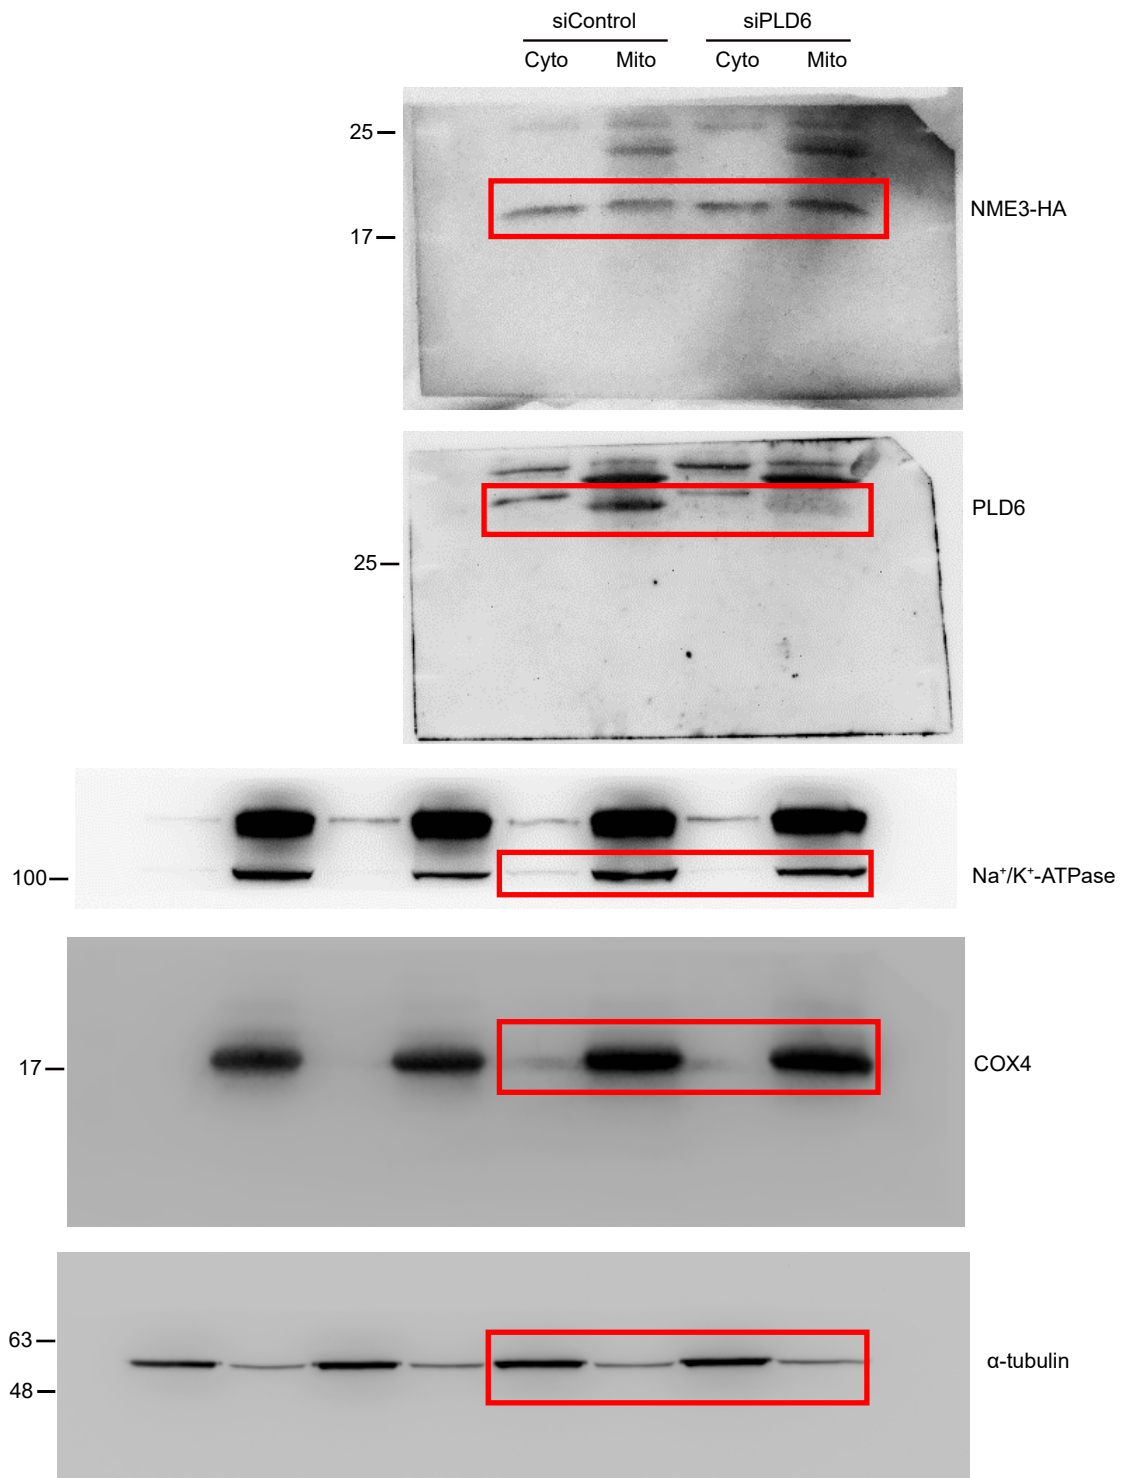

Supplement: JCB_202301091_SourceDataFS4.pdf [file JCB_202301091_SourceDataFS4.pdf]
